# Supplementary material for: A “plan bee” for cities: Pollinator diversity and plant-pollinator interactions in urban green spaces
Source: PubMed Central journal article supplement (PMC7363068; doi:10.1371/journal.pone.0235492), 2020-07-15

**S1 Table:** Visual examples of the differentiated park types in the research study.

Prestigious park

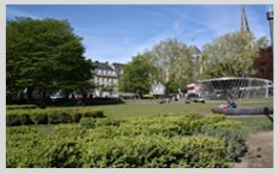

Recreational park

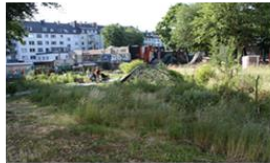

Cemetery

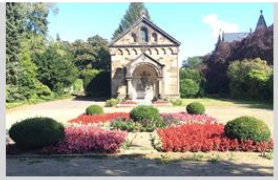

Community garden

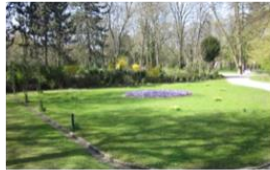

Rural reference

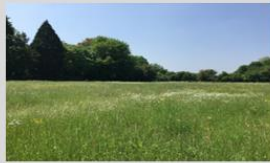

Supplement: pone.0235492.s001.pdf [file pone.0235492.s001.pdf]
