# Supplementary material for: A “plan bee” for cities: Pollinator diversity and plant-pollinator interactions in urban green spaces
Source: PubMed Central journal article supplement (PMC7363068; doi:10.1371/journal.pone.0235492), 2020-07-15
Supplement: pone.0235492.s002.pdf [file pone.0235492.s002.pdf]

**S2 Table:** Classification of pollinator genus and species into flower visitor categories of the research study.

| <b>Morphological groups in general survey (designed flower beds, trees)</b> | <b>classification for plant-pollinator interactions (public beds)</b> | <b>associated pollinator genus and species</b>                                                                                                                                        |
|-----------------------------------------------------------------------------|-----------------------------------------------------------------------|---------------------------------------------------------------------------------------------------------------------------------------------------------------------------------------|
| <b>Apis mellifera</b>                                                       | <i>Apis mellifera</i>                                                 | western honey bee <i>Apis mellifera</i>                                                                                                                                               |
| <b>bumblebee</b>                                                            | <i>Bombus terrestris</i>                                              | large earth bumblebee <i>Bombus terrestris</i>                                                                                                                                        |
|                                                                             | other bombus species (incl. Psithyrus)                                | e.g. <i>Bombus hortorum</i> , <i>Bombus lapidarius</i> , <i>Bombus pratorum</i> , <i>Bombus hypnorum</i> , <i>Bombus pascuorum</i>                                                    |
| <b>syrphids / hoverfly</b>                                                  | <i>Episyrphus balteatus</i>                                           | marmalade hoverfly <i>Episyrphus balteatus</i>                                                                                                                                        |
|                                                                             | all other Syrphidae                                                   | e.g. <i>Eristalis</i> , <i>Dasisyrphus</i> , <i>Helophilus</i> , <i>Platichirus</i> , <i>Volucella</i> , <i>Xylota</i> , <i>Syrphus</i>                                               |
| <b>solitary bees</b>                                                        | small solitary bees                                                   | mainly small species of <i>Halictus</i> , <i>Lasioglossum</i> & <i>Hylaeus</i> , but also small Megachilidae like <i>Chelostoma</i> , <i>Osmia</i> & <i>Heriades</i> , 6-10 mm length |
|                                                                             | large Megachilidae (sternit scopa bees)                               | large members of the family <i>Megachilidae</i> e.g. <i>Megachile</i> (leafcutter bees), <i>Osmia</i> (mason bees), <i>Anthidium</i> (carder bees)                                    |
|                                                                             | large solitary bees                                                   | other wild bees > 10 mm, e.g. <i>Andrena</i> , <i>Colletes</i> , large <i>Halictus</i> & <i>Lasioglossum</i>                                                                          |
| <b>others</b>                                                               | Calliphoridae                                                         | -                                                                                                                                                                                     |
|                                                                             | Formicidae                                                            | -                                                                                                                                                                                     |
|                                                                             | Chrysomelidae                                                         | -                                                                                                                                                                                     |
|                                                                             | Pieridae                                                              | -                                                                                                                                                                                     |
|                                                                             | Vespinae                                                              | -                                                                                                                                                                                     |
|                                                                             | other_Hymenoptera                                                     |                                                                                                                                                                                       |
|                                                                             | Muscidae                                                              | -                                                                                                                                                                                     |
|                                                                             | Pentatomidae                                                          | -                                                                                                                                                                                     |
|                                                                             | Lynphiidae                                                            | -                                                                                                                                                                                     |
|                                                                             | Conopidae                                                             | -                                                                                                                                                                                     |
|                                                                             | Nymphalidae                                                           | -                                                                                                                                                                                     |

|  |                   |   |
|--|-------------------|---|
|  | Spheciformes      | - |
|  | Tipulidae         | - |
|  | Polistinae        | - |
|  | Xiphydriidae      | - |
|  | Chrysididae       | - |
|  | Coccinellidae     | - |
|  | Berytidae         | - |
|  | Agelenidae        | - |
|  | Miridae           | - |
|  | Noctuidae         | - |
|  | Lycaenidae        | - |
|  | Pyrrhocoridae     | - |
|  | other_Heteroptera |   |
