# Supplementary material for: A “plan bee” for cities: Pollinator diversity and plant-pollinator interactions in urban green spaces
Source: PubMed Central journal article supplement (PMC7363068; doi:10.1371/journal.pone.0235492), 2020-07-15
Supplement: pone.0235492.s003.pdf [file pone.0235492.s003.pdf]

**S3 Table:** Plant species and respective flower syndrome of public flower beds in green spaces in the city of Aachen, Germany, during summer 2016. If no information about flower syndrome of a concrete species was available, the information was taken from a related sister species (<http://floraweb.de/> , [www.biolflo.de](http://www.biolflo.de) ). A representative of the morphogroup is shown and marked in bold.

| flower syndrome             | Example of flower syndrome                                                          | Species<br>(correction factor for plant pollinator network analyses) | site                                  |
|-----------------------------|-------------------------------------------------------------------------------------|----------------------------------------------------------------------|---------------------------------------|
| <b>Hymenoptera syndrome</b> |    | <b><i>Nepeta x faassenii</i></b> (1.08)                              | Elisengarten                          |
|                             |                                                                                     | <i>Salvia nemorosa</i> (0.67)                                        | Elisengarten, Frankenbergpark         |
|                             |                                                                                     | <i>Salvia farinacea</i> (1.08)                                       | Stadtgarten                           |
|                             |                                                                                     | <i>Salvia splendens</i> (1.08)                                       | Stadtgarten                           |
| <b>pollen syndrome</b>      |   | <i>Rosa x centifolia</i> (1.08)                                      | Elisengarten                          |
| <b>generalist syndrome</b>  |  | <i>Geranium x magnificum</i> (1.08)                                  | Frankenbergpark                       |
|                             |                                                                                     | <i>Bidens ferulifolia</i> (1.08)                                     | Community garden Hirschgrün           |
|                             |                                                                                     | <i>Calendula officinalis</i> (1.08)                                  | Community garden Hirschgrün           |
|                             |                                                                                     | <b><i>Dahlia hortensis</i></b> (0.52)                                | Community garden Hirschgrün, Vielfeld |
|                             |                                                                                     | <i>Tagetes tenuifolia</i> (1.08)                                     | Community garden Hirschgrün           |
|                             |                                                                                     | <i>Heliotropium arborescens</i> (1.08)                               | Ostfriedhof                           |
|                             |                                                                                     | <i>Coreopsis lanceolata</i> (1.08)                                   | Westpark                              |
| <b>butterfly syndrome</b>   |  | <i>Nicotiana x sanderae</i> (1.08)                                   | Ostfriedhof                           |
|                             |                                                                                     | <b><i>Dianthus chinensis</i></b> (1.08)                              | Westpark                              |

|                    |                                                                                   |                                        |             |
|--------------------|-----------------------------------------------------------------------------------|----------------------------------------|-------------|
| bumblebee syndrome |  | <i>Antirrhinum majus</i> (1.08)        | Westpark    |
|                    |                                                                                   | <i>Penstemon x gloxinioides</i> (1.08) | Westpark    |
| n.d.               |  | <i>Begonia semperflorens</i> (1.08)    | Ostfriedhof |
|                    |                                                                                   | <i>Tarenaya hassleriana</i> (1.08)     | Westpark    |
