# Supplementary material for: A “plan bee” for cities: Pollinator diversity and plant-pollinator interactions in urban green spaces
Source: PubMed Central journal article supplement (PMC7363068; doi:10.1371/journal.pone.0235492), 2020-07-15
Supplement: pone.0235492.s004.pdf [file pone.0235492.s004.pdf]

**S4 Table:** Pre-studies for testing and adjustment of the chosen study design; s=number of different investigated structural units (=number of different beds/trees).

| year | Park type           | Structure type   | Number of samplings             | N total    |
|------|---------------------|------------------|---------------------------------|------------|
| 2015 | Representative park | Public bed (s=1) | 21                              | 120        |
|      | Recreational park   | Public bed (s=5) | 69                              |            |
|      | Cemetery            | Public bed (s=1) | 30                              |            |
| 2014 | Representative park | Public bed (s=1) | 30                              | 102        |
|      | Recreational park   | Public bed (s=5) | 18                              |            |
|      | Community garden    | Public bed (s=1) | 27                              |            |
|      | Rural reference     | Public bed (s=3) | 27                              |            |
|      |                     |                  | <b>N<sub>pre-studies</sub>=</b> | <b>222</b> |
